# Supplementary material for: Unveiling the strain-sensitive thermal transport properties of chlorinated diamane
Source: Royal Society of Chemistry journal article supplement (doi:10.1039/d4cp01239a), 2024-01-01
Supplement: d4cp01239a1.pdf [file d4cp01239a1.pdf]

## Supporting Information

### Unveiling the Strain-Sensitive Thermal Transport Properties of Chlorinated Diamane

Tingting Zhang\* and Liyan Zhu\*

Department of Physics, and Jiangsu Key Laboratory of Modern Measurement Technology and Intelligent Systems, Huaiyin Normal University, Huai'an 223300, People's Republic of China

\*Email: [tzhang@hytc.edu.cn](mailto:tzhang@hytc.edu.cn) (T. Z.) and [lyzhu@hytc.edu.cn](mailto:lyzhu@hytc.edu.cn) (L. Z.)

#### Contents

S1. The localized phonon density of states.

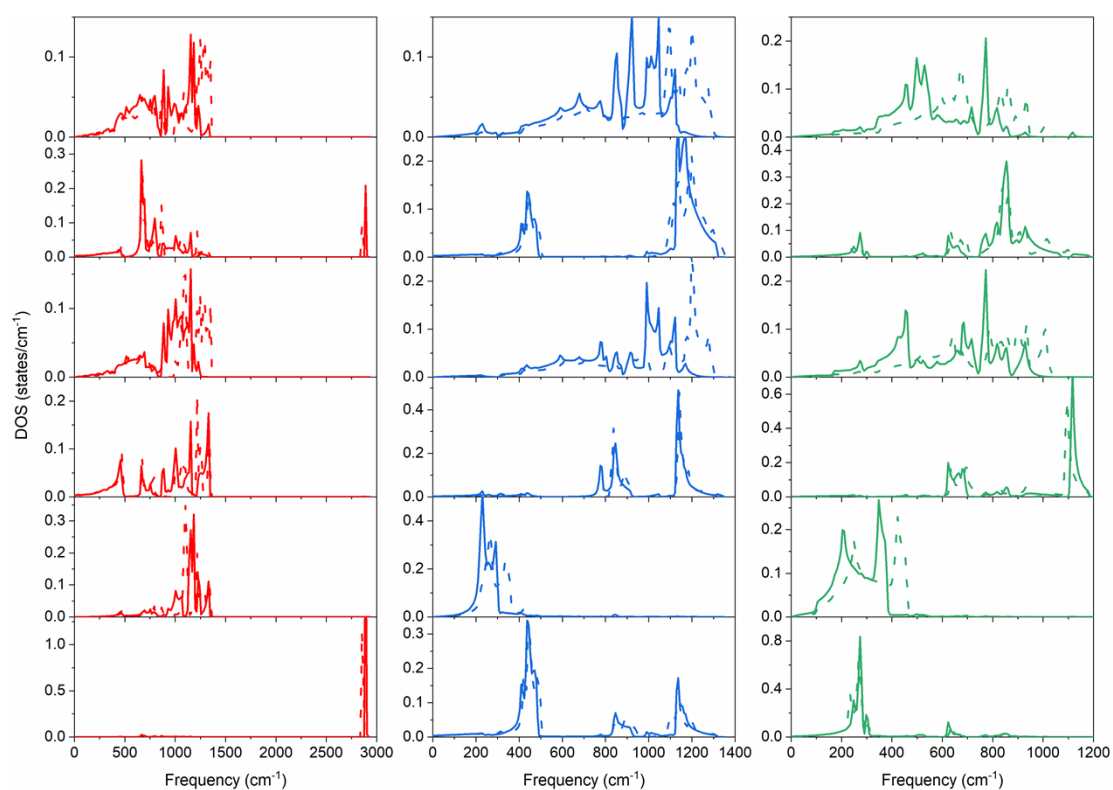

Figure S1. The local density of states for A- and B-type carbon atoms and functional groups projected along the in-plane and out-of-plane directions in HD (left), FD (middle), and CID (right), both with solid lines representing 5%-strained configurations and dashed lines representing unstrained configurations. Moving from top to bottom, the panels depict the in-plane and out-of-plane A-type carbon atom, followed by the in-plane and out-of-plane B-type carbon atom, and finally the in-plane and out-of-plane H/F/Cl atom.
